CORRECTION

# Correction: The association between methylphenidate treatment and the risk for fracture among young ADHD patients: A nationwide population-based study in Taiwan

Vincent Chin-Hung Chen, Yao-Hsu Yang, Yin-To Liao, Ting-Yu Kuo, Hsin-Yi Liang, Kuo-You Huang, Yin-Cheng Huang, Yena Lee, Roger S. McIntyre, Tzu-Chin Lin

The affiliation for the tenth author is incorrect. Tzu-Chin Lin is incorrectly listed as being affiliated with **6** School of Traditional Chinese Medicine, College of Medicine, Chang Gung University, Taoyuan, Taiwan. Tzu-Chin Lin is affiliated with **7** Department of Psychiatry, Chung Shan Medical University Hospital, Taichung, Taiwan, and **8** Department of Psychiatry, School of Medicine, Chung Shan Medical University, Taichung, Taiwan.

## Reference

1. Chen VC-H, Yang Y-H, Liao Y-T, Kuo T-Y, Liang H-Y, Huang K-Y, et al. (2017) The association between methylphenidate treatment and the risk for fracture among young ADHD patients: A nationwide population-based study in Taiwan. PLoS ONE 12(3): e0173762. doi:[10.1371/journal.pone.0173762](https://doi.org/10.1371/journal.pone.0173762) PMID: [28296941](https://pubmed.ncbi.nlm.nih.gov/28296941/)

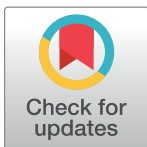

## OPEN ACCESS

**Citation:** Chen VC-H, Yang Y-H, Liao Y-T, Kuo T-Y, Liang H-Y, Huang K-Y, et al. (2017) Correction: The association between methylphenidate treatment and the risk for fracture among young ADHD patients: A nationwide population-based study in Taiwan. PLoS ONE 12(4): e0175617. <https://doi.org/10.1371/journal.pone.0175617>

**Published:** April 6, 2017

**Copyright:** © 2017 Chen et al. This is an open access article distributed under the terms of the [Creative Commons Attribution License](https://creativecommons.org/licenses/by/4.0/), which permits unrestricted use, distribution, and reproduction in any medium, provided the original author and source are credited.
